# Supplementary material
Source: PubMed Central journal article supplement (PMC2587590)
Supplement: 0808985105_0808985105SI.pdf [file 0808985105_0808985105SI.pdf]

# Supporting Information

Vega Thurber *et al.* 10.1073/pnas.0808985105

## SI Methods

**Virome Generation.** Metagenomic viral DNA extractions: Viral particles were isolated using cesium chloride (CsCl) gradient centrifugation. Coral slurries were centrifuged at 3,000 rpm for 15 min to remove coral debris, and the supernatant was placed in a new 50 mL conical tube. CsCl gradients were made with FASW, and loaded in the following densities: 1.7, 1.5, and 1.35 mg·mL<sup>-1</sup>, respectively. To each gradient, ≈9 mL of sample supernatant was added. Gradients were then centrifuged at 82,000 × *g* for 2 hours in a Beckman Ultracentrifuge at 4°C. The 1.5–1.35 mg·mL<sup>-1</sup> fraction was removed with an 18-gauge needle on a sterile syringe and run through an additional gradient to ensure that all bacteria and debris were removed. A subsample of the resulting fraction was analyzed for the presence of contaminating eukaryotic and microbial cells using Sybr Gold (Invitrogen) staining and epifluorescence microscopy as described in ref. 1. The viral fraction was then DNase I treated to remove any residual free DNA. Viral DNA was extracted using formamide and CTAB, as described in ref. 1. To verify the absence of contaminating eukaryotic and microbial DNA 16S and 18S PCR was conducted on all samples before sequencing as described in ref. 2. No bands were detected.

Virome DNA from each time point and treatment was isolated and extracted to generate twenty-five temporal samples, which were subsampled, amplified, and then pooled by treatment for metagenomic library construction (Fig. S1). Once purified, 1 ng of viral genomic DNA from all samples underwent amplification, using GenomiPhi from GE LifeSciences (Quebec, Canada) and repurification with a DNeasy Blood and Tissue Kit from QIAGEN (Valencia, CA). Each of the metagenomic libraries included equal amounts of the amplified DNA from the 1, 4, 16, and 64 h isolates of each corresponding treatment, except the reference sample time zero, which was a pool of all of the time 0 temporal samples (Fig. S1). Approximately 5 μg of total genomic DNA for each library was sent to 454 Life Sciences (Branford, CT) for pyrosequencing using GS20 technology (Fig. S1).

Each of the reads was parsed, stored, assigned a number, and archived at the San Diego State Center for Universal Microbial

Sequencing (<http://scums.sdsu.edu>). Each viral metagenome can be accessed through this website under the accession nos. 4440374.3, 4440375.3, 4440370.3, 4440371.3, 4440377.3, 4440376.3, but are also found at National Center for Biotechnology Information as genome projects IDs: 28427, 28429, 28431, 28433, 28435, and 28437.

**Repeat stressor experiment:** All parameters were identical to the initial experiment except that in the Temperature treatment, water was increased to 3°C above ambient instead of 5°C. Also, in the ocean acidity stressor, seawater pH was reduced to 7.8 to reflect a more likely environmental change. Salinity, temperature and pH were measured at every sampling.

**Herpes-like thymidylate synthase contig assembly.** Sequences from each metagenome that were annotated as herpes-like were assembled using SeqMan from DNASTAR Inc. (Madison, WI) using 99% similarity, 35 base pair overlaps, and a minimum sequence read length of 80 base pairs. Contigs were generated and consensus viral sequences were identified using PSI-BLAST to the non-redundant database at National Center for Biotechnology Information. Primer sets were generated and used first for conventional PCR and then real-time PCR, cloning, and Sanger sequencing.

**PCR and putative herpes-like thymidylate synthase gene sequence cloning.** For the putative herpes-like virus thymidylate synthase gene, PCR was carried out in 50 μL of standard reactions containing 200 nM primers and 25 ng of total viral DNA. Touch down thermocycling was conducted using a 3 min 95°C hot start and 30 cycles of the following: 95°C for 1 min, 60°C (–0.5°C) for 30 seconds, and 72°C for 1 min. A 10-min extension at 72°C completed the PCR. Samples were run on a 1 or 1.5% agarose gel. PCR reactions were purified using a PCR AccuPrep Kit from BioNeer and cloned using a TopoTA Kit from Invitrogen. Sequencing was conducted at the CSU-PERB Microchemical Core Facility. Sequences were trimmed by hand and homology identified using PSI-BLAST to the nonredundant database at National Center for Biotechnology Information.





**Table S1. Metagenome characteristics and similarity statistics when compared against the non-redundant ( $e < 10^{-4}$ ) database at NCBI using BLASTn. Each sequence with a similarity in the NR was given a taxonomic assignment (viral, bacterial, eukaryotic) based on its best (smallest  $e$  value) similarity**

| Sample      | Reads  | Approx. read length | Known, % | GC content, % | Viral, % | Bacterial, % | Eukaryotic, % |
|-------------|--------|---------------------|----------|---------------|----------|--------------|---------------|
| Time zero   | 39,270 | 101.32              | 2.12     | 42.25         | 1.87     | 64.14        | 33.14         |
| Control     | 39,340 | 103.7               | 5.21     | 46.48         | 2.89     | 90.18        | 6.05          |
| Temperature | 39,036 | 113.38              | 2.01     | 48.27         | 0.98     | 58.09        | 40.05         |
| DOC         | 35,680 | 102.18              | 1.88     | 42.49         | 8.71     | 71.24        | 19.55         |
| pH          | 50,368 | 104.73              | 1.57     | 43            | 3.37     | 68.67        | 27.44         |
| Nutrient    | 34,433 | 107.18              | 1.83     | 45.1          | 6.92     | 76.82        | 15.32         |

**Table S2. Coral-associated viral metagenomes were compared for similarity to four previously isolated marine water viromes**

| Sample      | Kingman Reef | Christmas Reef | Palmyra Reef | Tabuaren Reef |
|-------------|--------------|----------------|--------------|---------------|
| Time zero   | 10.53        | 10.88          | 11.10        | 6.52          |
| Control     | 2.49         | 3.65           | 5.57         | 1.13          |
| Temperature | 29.07        | 20.12          | 38.14        | 25.44         |
| DOC         | 1.58         | 2.46           | 1.74         | 0.77          |
| pH          | 11.91        | 9.63           | 16.29        | 9.59          |
| Nutrient    | 17.41        | 11.81          | 23.04        | 14.27         |

Percentage similarities between each coral library and reef water viral library were calculated using BLASTn ( $e < 10^{-4}$ ).

Table S3. Examples of combined viral metagenome coverage to 2,020 fully sequenced viral genomes from NCBI

| Virus                                | Accession no. | Genome size, kb | Family          | Similarities | Coverage    |
|--------------------------------------|---------------|-----------------|-----------------|--------------|-------------|
| <i>A. polyphaga</i> mimivirus        | NC_006450     | 1181.4          | Mimivirus       | 952          | 0.09        |
| <i>A. tigrinum</i> virus             | NC_005832     | 106.33          | Iridoviridae    | 64           | 0.07        |
| <i>A. moorei</i> entomopoxvirus      | NC_002520     | 232.4           | Poxviridae      | 333          | 0.16        |
| Bovine herpesvirus 1                 | NC_001847     | 135.3           | Herpesviridae   | 1071         | <b>0.87</b> |
| Bovine herpesvirus 5                 | NC_005261     | 137.82          | Herpesviridae   | 360          | 0.29        |
| Canarypox virus                      | NC_005309     | 359.85          | Poxviridae      | 168          | 0.05        |
| Cercopithecine herpesvirus 1         | NC_004812     | 156.8           | Herpesviridae   | 666          | <b>0.47</b> |
| Cercopithecine herpesvirus 16        | NC_007653     | 156.5           | Herpesviridae   | 976          | <b>0.69</b> |
| Cercopithecine herpesvirus 2         | NC_006560     | 150.72          | Herpesviridae   | 1282         | <b>0.94</b> |
| <i>E. siliculosus</i> virus          | NC_002687     | 335.59          | Phycodnaviridae | 174          | 0.06        |
| <i>E. huxleyi</i> virus 86           | NC_007346     | 407.34          | Phycodnaviridae | 725          | 0.20        |
| Equid herpesvirus 2                  | NC_001650     | 184.43          | Herpesviridae   | 176          | 0.10        |
| Human herpesvirus 1                  | NC_001806     | 152.26          | Herpesviridae   | 216          | 0.16        |
| Human herpesvirus 2                  | NC_001798     | 154.746         | Herpesviridae   | 283          | 0.20        |
| <i>M. sanguinipes</i> entomopoxvirus | NC_001993     | 236.12          | Poxviridae      | 169          | 0.08        |
| <i>P. bursaria</i> Chlorella virus 1 | NC_000852     | 330.74          | Phycodnaviridae | 414          | 0.14        |
| Shrimp spot syndrome virus           | NC_003225     | 305.11          | Nimaviridae     | 125          | 0.05        |
| Singapore grouper iridovirus         | NC_006549     | 140.13          | Iridoviridae    | 169          | 0.13        |
| Suid herpesvirus 1                   | NC_006151     | 143.46          | Herpesviridae   | 862          | <b>0.66</b> |
| Tupaia herpesvirus                   | NC_002794     | 195.86          | Herpesviridae   | 238          | 0.13        |

All coral-associated viral metagenomes were combined and the number of sequence similarities ( $e < 10^{-6}$ ) to each genome was calculated. Frequency tables were generated for each 2,500-bp bin across each reference genome. First, the number of synonymous nucleotides between the metagenome and the reference genome was counted. Coverage was then calculated by dividing this number by the total length of reference the genome. Any genome with coverage equal to or greater than 0.05 is listed. Coverage values in bold denotes the 5 highest values.

**Table S4. Herpes-like viral sequences in the reference genomes of two Cnidarians**

| Nematostella Draft | Hydra ESTs |
|--------------------|------------|
| 5507928            | 74131562   |
| 5500715            | 74132680   |
| 5503168            | 68410998   |
| 5522046            |            |
| 5497885            |            |
| 5517497            |            |
| 5512689            |            |
| 5521542            |            |
| 5498193            |            |
| 5515317            |            |
| 5515317            |            |
| XP.001626845       |            |
| EDO34745           |            |
| XP.001641920       |            |
| EDO49857           |            |
| XP.001636448       |            |
| EDO44385           |            |
| XP.001629245       |            |
| XP.001627817       |            |
| XP.001626452       |            |
| XP.001624299       |            |
| XP.001621368       |            |
| XP.001617849       |            |
| EDO25749           |            |
| EDO29268           |            |
| EDO32199           |            |
| EDO34352           |            |
| EDO35717           |            |
| EDO37182           |            |
